# Supplementary material for: Covalent functionalization of few-layer TiS2 with tetraphenylporphyrin: toward a donor–acceptor nanohybrid featuring enhanced nonlinear saturation absorption
Source: Royal Society of Chemistry journal article supplement (doi:10.1039/d2tc01626e), 2022-01-01
Supplement: d2tc01626e1.pdf [file d2tc01626e1.pdf]

## Supporting Information for

# Covalent functionalization of few-layer $\text{TiS}_2$ with tetraphenylporphyrin: toward a donor-acceptor nanohybrid featuring enhanced nonlinear saturation absorption

*Yan Fang,<sup>†</sup> Hui Li,<sup>†</sup> Zhiyuan Wei,<sup>†</sup> Zihao Guan,<sup>†</sup> Naying Shan,<sup>†</sup> Lulu Fu,<sup>†</sup> Zhipeng Huang,<sup>†</sup> Mark G. Humphrey,<sup>‡</sup> Chi Zhang<sup>\*,†</sup>*

<sup>†</sup> China-Australia Joint Research Center for Functional Molecular Materials, School of Chemical Science and Engineering, Tongji University, Shanghai 200092, China

<sup>‡</sup> Research School of Chemistry, Australian National University, Canberra, ACT 2601, Australia

## Section S1. Calculation of nonlinear absorption parameters.

The total absorption coefficient of a material can be written as

$$\alpha(I) = \alpha_0 + \beta I, \quad (\text{Equation S1})$$

where  $\alpha_0$  and  $\beta$  are linear absorption coefficient and nonlinear absorption coefficient, respectively.  $I$  is the incident light intensity. The corresponding light propagation model is expressed as<sup>1</sup>

$$\frac{dI}{dz} = -(\alpha_0 + \beta I)I, \quad (\text{Equation S2})$$

As for open aperture Z-scan, the normalized transmittance can be given as<sup>1</sup>

$$T(z) = \sum_{m=0}^{\infty} \frac{\left[ \frac{-\beta I_0 L_{eff}}{1 + z^2/z_0^2} \right]^m}{(m+1)^{3/2}}, \quad (\text{Equation S3})$$

where  $L_{eff} = (1 - e^{-\alpha_0 L})/\alpha_0$  is the effective interaction length,  $\alpha_0$  is the linear absorption coefficient,  $L$  is the sample thickness,  $\beta$  is the nonlinear absorption coefficient,  $I_0$  is the on-axis peak intensity at the focal plane, and  $z_0$  is the Rayleigh diffraction length.

By fitting the experimental data, the nonlinear absorption coefficient  $\beta$  can be obtained. The imaginary part of the third-order nonlinear susceptibility ( $Im\chi^{(3)}$ ) was calculated according to<sup>2</sup>

$$Im\chi^{(3)} = \left[ \frac{10^{-7} C \lambda n^2}{96\pi^2} \right] \beta, \quad (\text{Equation S4})$$

where  $C$  is the speed of light,  $\lambda$  is the wavelength of the laser, and  $n$  is the refractive index.

After transforming the normalized transmittance as a function of laser intensity, we can obtain the saturation intensity ( $I_s$ ) by fitting the curves with a nonlinear transmission model:<sup>3,4</sup>

$$T(I) = A * \exp\left(\frac{-\Delta T}{1 + I/I_s}\right), \quad (\text{Equation S5})$$

where  $T(I)$  is the intensity-dependent transmission.  $\Delta T$ ,  $I_s$ , and  $A$  are modulation depth, saturation intensity, and normalization constant, respectively.

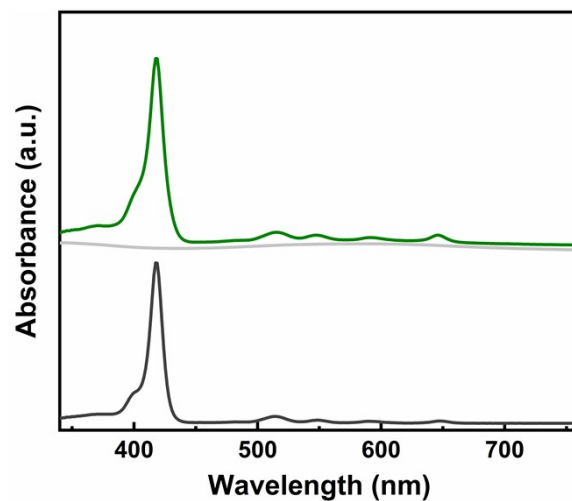

**Figure S1.** UV-Vis absorption spectra of a mixture containing TPP and exf-TiS<sub>2</sub> (dark grey). Light grey and olive lines represent the isolated solid (the reference sample of physisorbed material) and the filtrate, respectively, after being processed likewise TPP-TiS<sub>2</sub>. No absorption peak of TPP could be observed from the light grey line, indicating negligible physisorption.

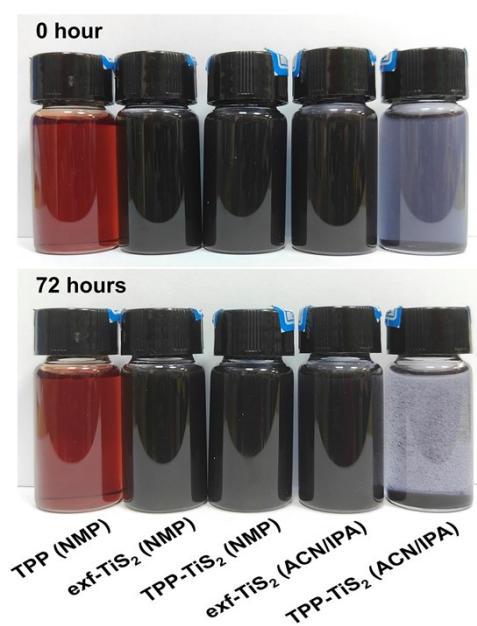

**Figure S2.** Photographs of TPP, exf-TiS<sub>2</sub>, and TPP-TiS<sub>2</sub> dispersions with all concentrations at 0.1 mg ml<sup>-1</sup>. The top photograph exhibits the fresh dispersions after sonication for 10 minutes; the bottom one shows the dispersions after a 72-hour storage.

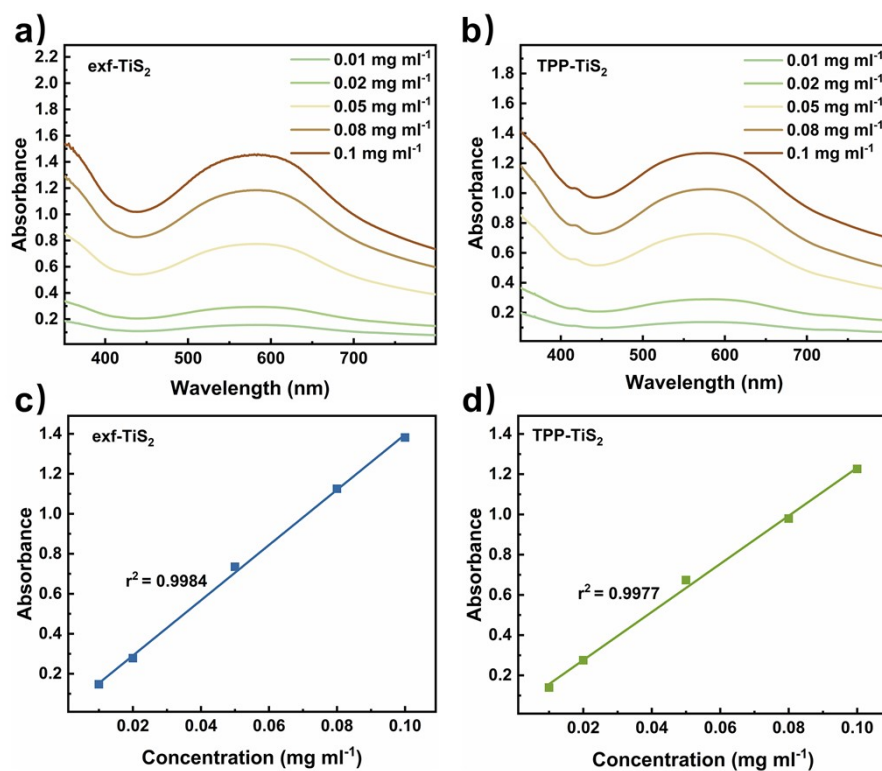

**Figure S3.** The absorption spectra of NMP dispersions of a) exf-TiS<sub>2</sub>, and b) TPP-TiS<sub>2</sub> at different concentration. The optical density of c) exf-TiS<sub>2</sub> and d) TPP-TiS<sub>2</sub> at different concentration at 532 nm.

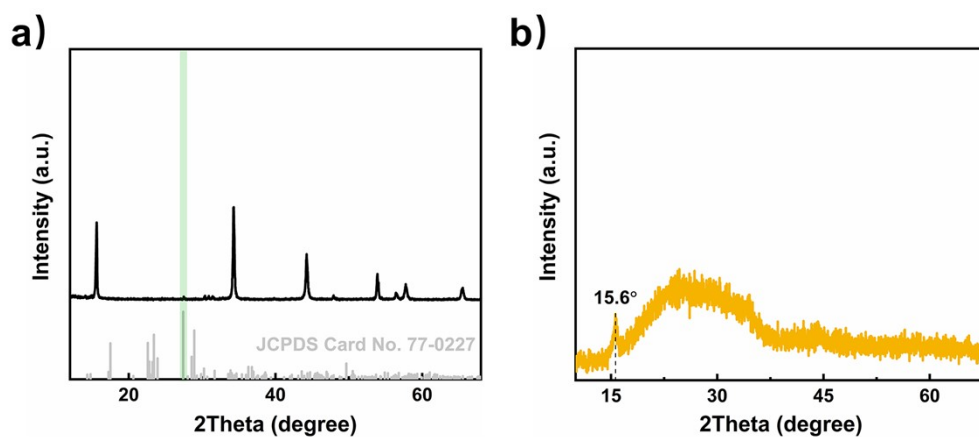

**Figure S4.** a) XRD pattern of bulk  $\text{TiS}_2$  (black) as compared with the standard pattern of S-JCPDS No. 77-0227 (grey). b) XRD pattern of the control sample prepared by treating exf- $\text{TiS}_2$  with the TPP- $\text{TiS}_2$  functionalization process without adding TPP diazonium salts.

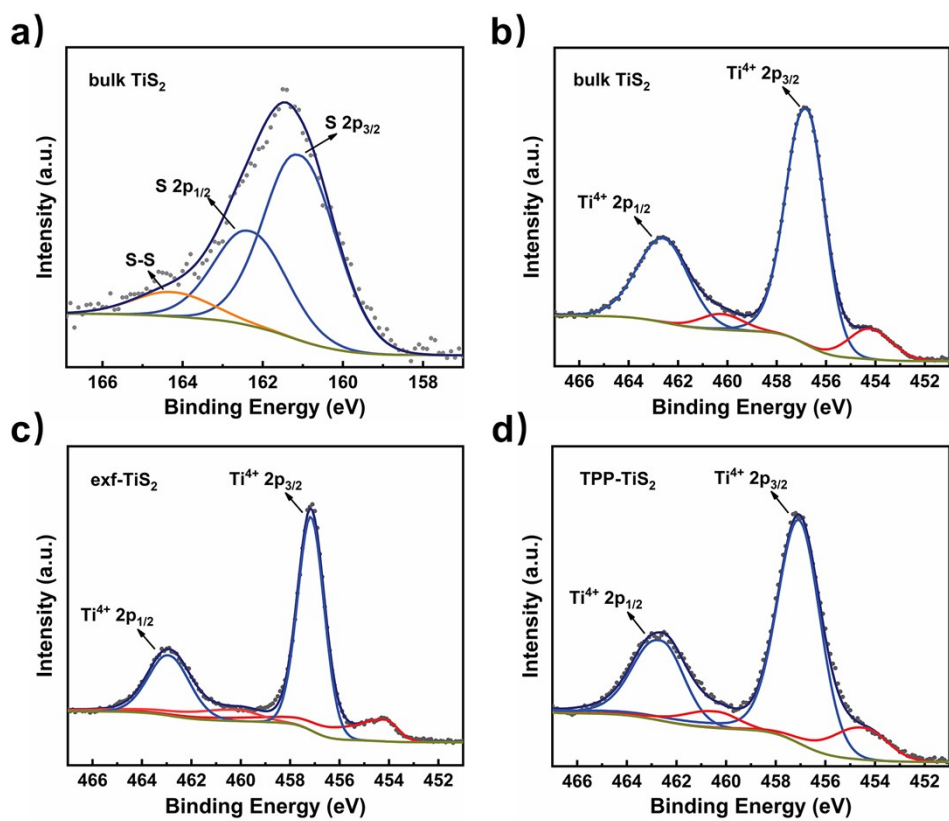

**Figure S5.** a) S 2p core-level XPS spectrum of bulk  $\text{TiS}_2$ . Ti 2p core-level XPS spectra of b) bulk  $\text{TiS}_2$ , c) exf- $\text{TiS}_2$ , and d) TPP- $\text{TiS}_2$ .

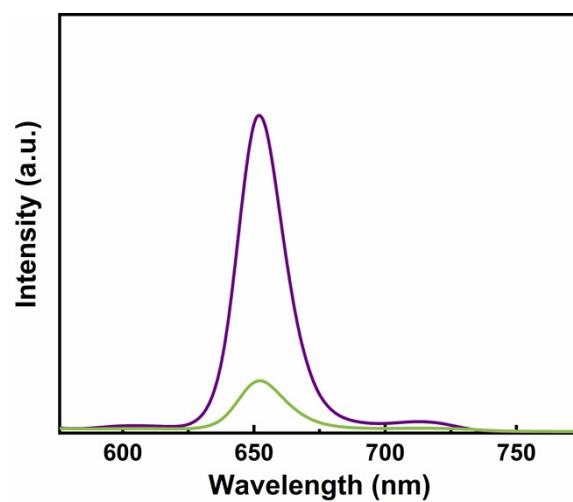

**Figure S6.** Photoluminescence spectra of TPP (purple) and the physically-blended sample (green) prepared by mixing TPP with exf-TiS<sub>2</sub> in the same content as the TPP-TiS<sub>2</sub> nanohybrid (roughly according to TGA results), obtained in NMP upon excitation at 418 nm.



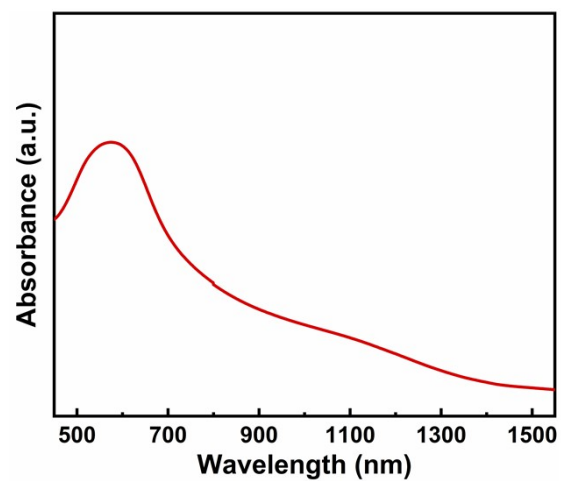

**Figure S7.** Vis-NIR absorption spectrum of exf-TiS<sub>2</sub> in NMP.

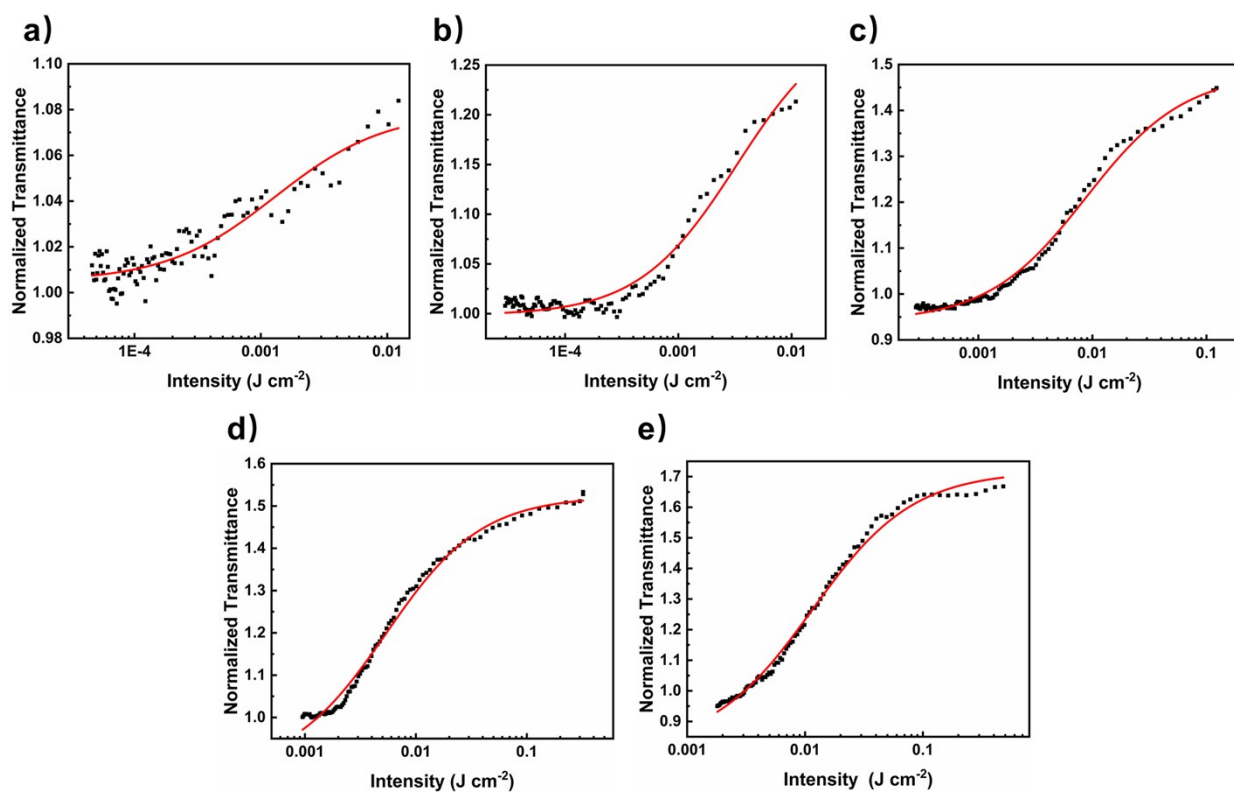

**Figure S8.** The relationship between normalized transmittance and the laser intensity at pulse energies of a) 6 μJ, b) 14 μJ, c) 42 μJ, d) 110 μJ, and e) 200 μJ, respectively, for exf-TiS<sub>2</sub> at 532 nm.

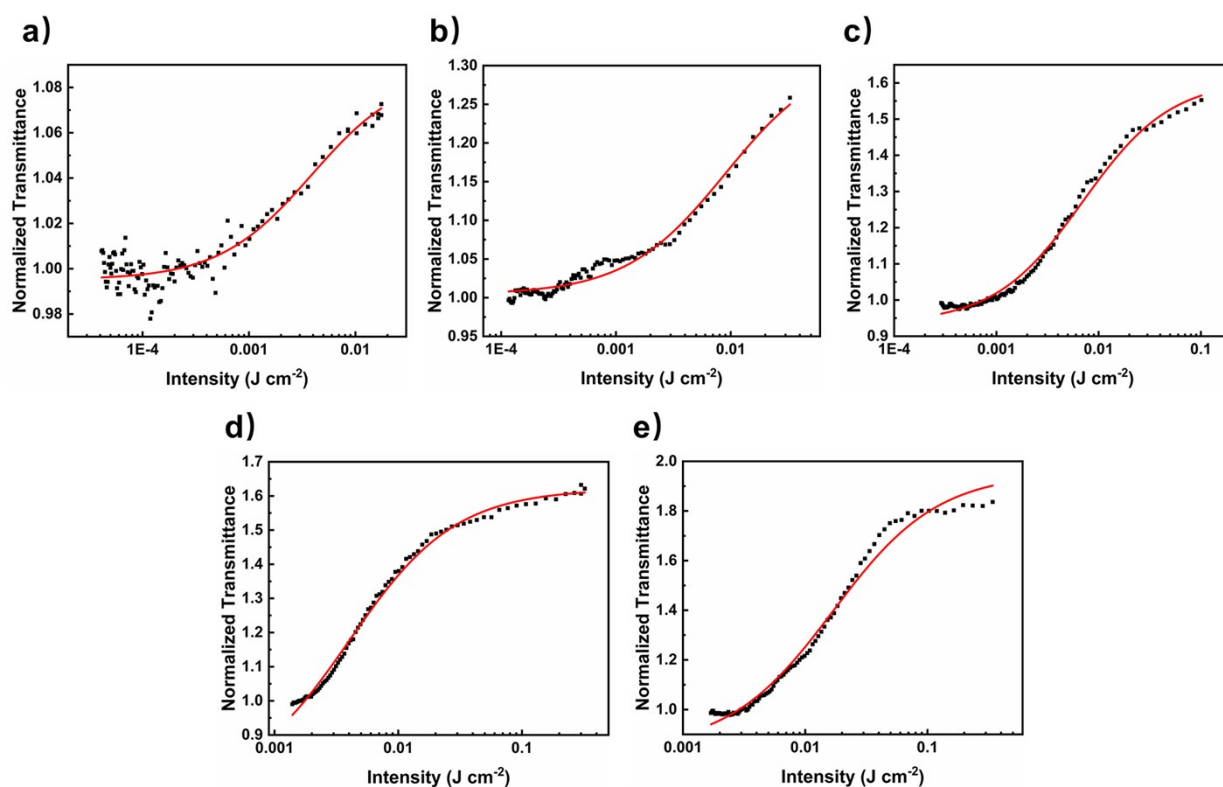

**Figure S9.** The relationship between normalized transmittance and the laser intensity at pulse energies of a) 6  $\mu\text{J}$ , b) 16  $\mu\text{J}$ , c) 42  $\mu\text{J}$ , d) 110  $\mu\text{J}$ , and e) 200  $\mu\text{J}$ , respectively, for TPP-TiS<sub>2</sub> at 532 nm.

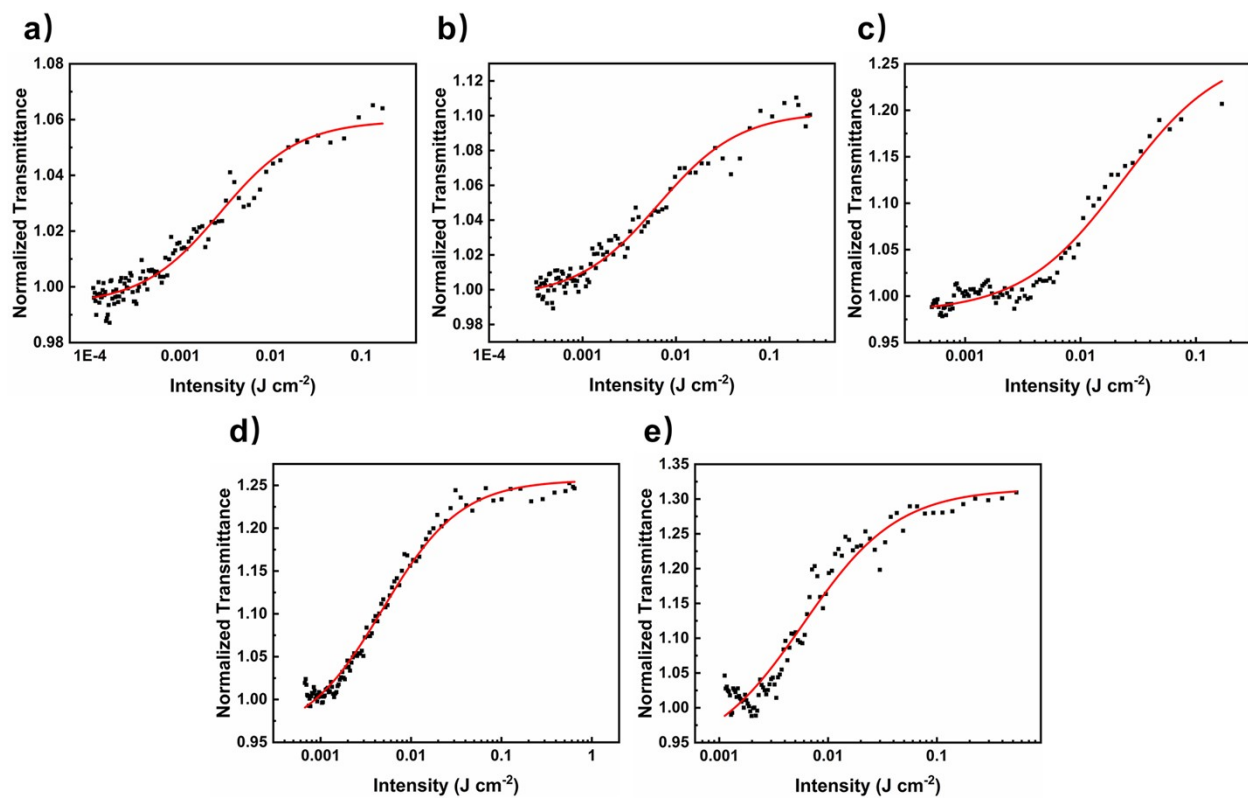

**Figure S10.** The relationship between normalized transmittance and the laser intensity at pulse energies of a) 60 μJ, b) 92 μJ, c) 132 μJ, d) 220 μJ, and e) 300 μJ, respectively, for exf-TiS<sub>2</sub> at 1064 nm.

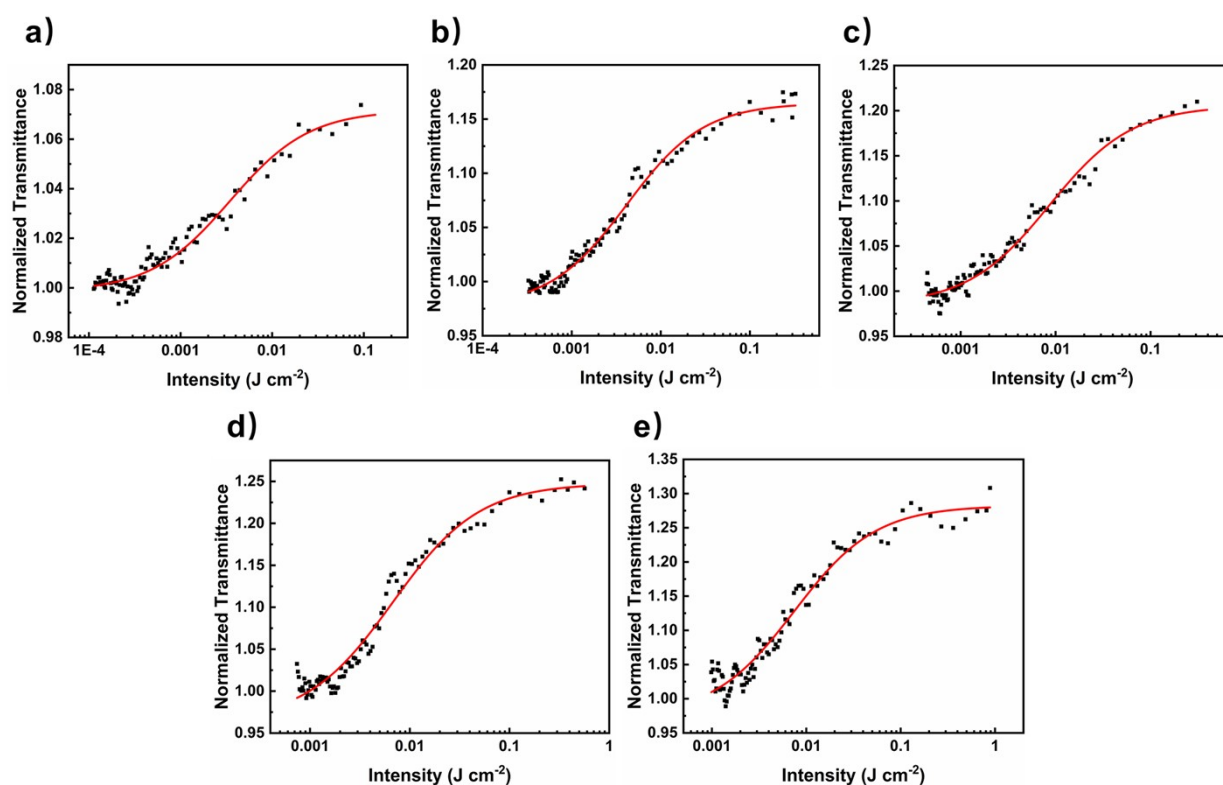

**Figure S11.** The relationship between normalized transmittance and the laser intensity at pulse energies of a) 60  $\mu\text{J}$ , b) 100  $\mu\text{J}$ , c) 151  $\mu\text{J}$ , d) 220  $\mu\text{J}$ , and e) 300  $\mu\text{J}$ , respectively, for TPP-TiS<sub>2</sub> at 1064 nm.

**Table S1.** Saturation Intensity ( $I_s$ ) for measured samples under different input fluence at 532 nm and 1064 nm, respectively.<sup>a</sup>

| Sample               | $\lambda$ (nm) | $E_I$ ( $\mu\text{J}$ ) | $I_0$ ( $\text{J cm}^{-2}$ ) | $I_s$ ( $\text{J cm}^{-2}$ ) | Averaged $I_s$ ( $\text{J cm}^{-2}$ ) |
|----------------------|----------------|-------------------------|------------------------------|------------------------------|---------------------------------------|
| exf-TiS <sub>2</sub> | 532            | 6                       | 0.0177                       | 0.0058                       | 0.0064                                |
|                      |                | 14                      | 0.0413                       | 0.0060                       |                                       |
|                      |                | 42                      | 0.1239                       | 0.0071                       |                                       |
|                      |                | 110                     | 0.3245                       | 0.0053                       |                                       |
|                      |                | 200                     | 0.5900                       | 0.0079                       |                                       |
|                      | 1064           | 60                      | 0.1770                       | 0.0052                       | 0.0053                                |
|                      |                | 92                      | 0.2714                       | 0.0056                       |                                       |
|                      |                | 132                     | 0.3894                       | 0.0057                       |                                       |
|                      |                | 220                     | 0.6490                       | 0.0049                       |                                       |
|                      |                | 300                     | 0.8850                       | 0.0050                       |                                       |
| TPP-TiS <sub>2</sub> | 532            | 6                       | 0.0177                       | 0.0058                       | 0.0058                                |
|                      |                | 16                      | 0.0472                       | 0.0064                       |                                       |
|                      |                | 42                      | 0.1239                       | 0.0053                       |                                       |
|                      |                | 110                     | 0.3245                       | 0.0051                       |                                       |
|                      |                | 200                     | 0.5900                       | 0.0063                       |                                       |
|                      | 1064           | 60                      | 0.1770                       | 0.0050                       | 0.0054                                |
|                      |                | 110                     | 0.3245                       | 0.0046                       |                                       |
|                      |                | 151                     | 0.4455                       | 0.0053                       |                                       |
|                      |                | 220                     | 0.6490                       | 0.0059                       |                                       |
|                      |                | 300                     | 0.8850                       | 0.0061                       |                                       |

<sup>a</sup> $\lambda$ : the wavelength of incident light;  $E_I$ : the energy of the input fluence per pulse;  $I_0$ : peak intensity;  $I_s$ : saturation intensity.

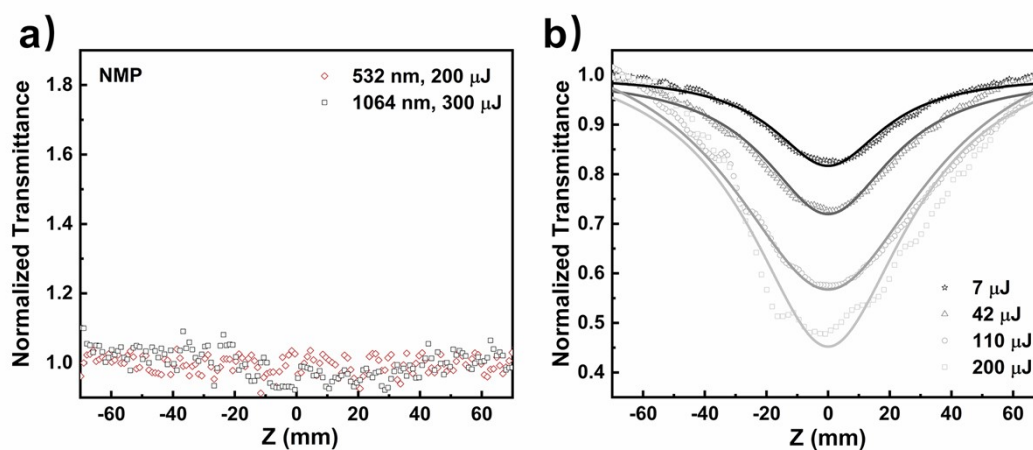

**Figure S12.** a) Open-aperture Z-scan data of blank solvent NMP at 532 nm under input fluence energy of 200  $\mu\text{J}$  and 1064 nm under input fluence energy of 300  $\mu\text{J}$ . b) Open-aperture Z-scan data of TPP solution in NMP under different input fluence energies at 532 nm.

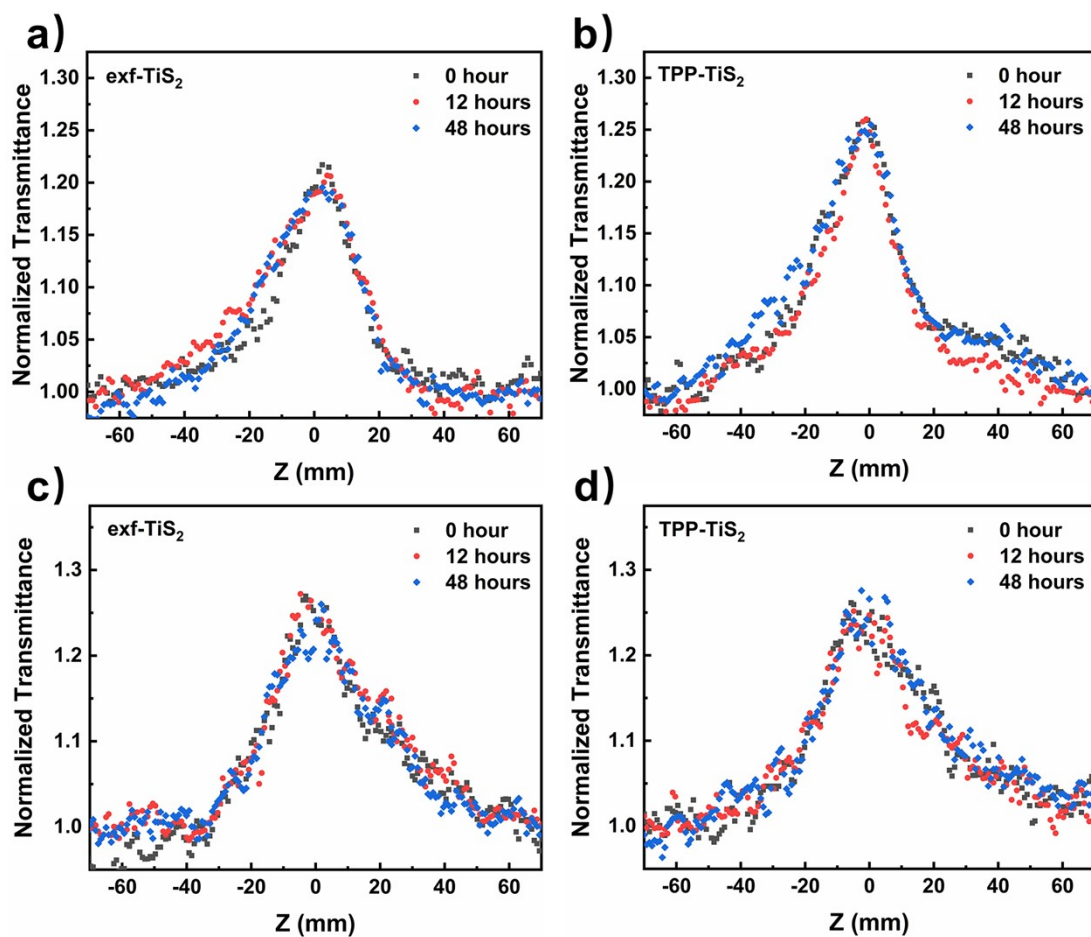

**Figure S13.** Z-scan results of a) exf-TiS<sub>2</sub> and b) TPP-TiS<sub>2</sub> at 532 nm with 15  $\mu$ J pulsed light; c) and d) are Z-scan results of exf-TiS<sub>2</sub> and TPP-TiS<sub>2</sub> at 1064 nm with 200  $\mu$ J pulsed light.



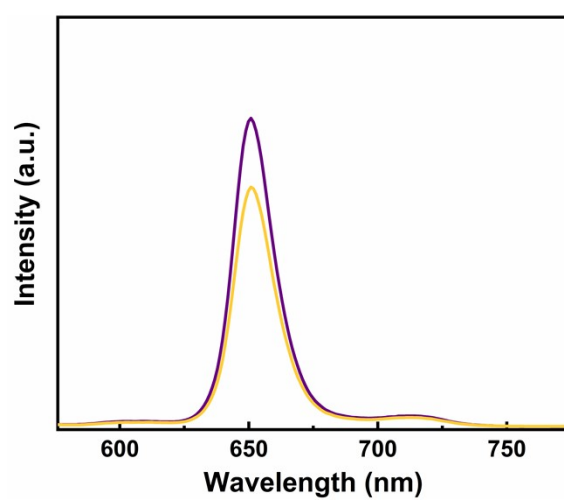

**Figure S14.** Photoluminescence spectrum of TPP (purple) as compared with the controlling sample TPP/TiS<sub>2</sub>, obtained in NMP upon excitation at 418 nm.

## References

- 1 M. Sheikbaha, A. A. Said, T. H. Wei, D. J. Hagan and E. W. Vanstryland, SENSITIVE MEASUREMENT OF OPTICAL NONLINEARITIES USING A SINGLE BEAM, *IEEE Journal of Quantum Electronics*, 1990, **26**, 760-769.
- 2 H. Li, S. Chen, D. W. Boukhvalov, Z. Yu, M. G. Humphrey, Z. Huang and C. Zhang, Switching the Nonlinear Optical Absorption of Titanium Carbide MXene by Modulation of the Surface Terminations, *ACS Nano*, 2022, **16**, 394-404.
- 3 H. Yu, H. Zhang, Y. Wang, C. Zhao, B. Wang, S. Wen, H. Zhang and J. Wang, Topological insulator as an optical modulator for pulsed solid-state lasers, *Laser Photonics Rev.*, 2013, **7**, 77-83.
- 4 S. Wang, H. Yu, H. Zhang, A. Wang, M. Zhao, Y. Chen, L. Mei and J. Wang, Broadband Few-Layer MoS<sub>2</sub> Saturable Absorbers, *Adv.Mater.*, 2014, **26**, 3538-3544.
